# Supplementary material for: Synthesis of thiophene-fused porphyrin dimers as effective π-extended helical chromophores
Source: Royal Society of Chemistry journal article supplement (doi:10.1039/d1cc04215g), 2021-01-01
Supplement: d1cc04215g1.pdf [file d1cc04215g1.pdf]

Supplementary Information

**Synthesis of thiophene-fused porphyrin dimers as efficiently  $\pi$ -extended helical chromophores**

Issei Nishimura<sup>1</sup>, Tomohiro Higashino\*<sup>1</sup> and Hiroshi Imahori\*<sup>1,2</sup>

<sup>1</sup>*Department of Molecular Engineering, Graduate School of Engineering, Kyoto University, Nishikyo-ku, Kyoto 615-8510, Japan*

<sup>2</sup>*Institute for Integrated Cell-Material Science (WPI-iCeMS), Kyoto University, Nishikyo-ku, Kyoto 615-8510, Japan*

t-higa@scl.kyoto-u.ac.jp, imahori@scl.kyoto-u.ac.jp

Contents

1. Experimental Section
2. Synthesis
3. High-Resolution Mass Spectra
4. NMR Spectra
5. X-Ray Crystallographic Details
6. Racemic Inversion Barriers
7. Optical Properties
8. Electrochemical Properties
9. DFT Calculations
10. References

## 1. Experimental Section

### Instrumentation and Materials.

Commercially available solvents and reagents were used without further purification unless otherwise mentioned. Silica-gel column chromatography was performed with UltraPure Silica Gel (230-400 mesh, SiliCycle) unless otherwise noted. Thin-layer chromatography (TLC) was performed with Silica gel 60 F<sub>254</sub> (Merck). UV/Vis/NIR absorption spectra were measured with a Perkin-Elmer Lambda 900 UV/vis/NIR spectrometer. <sup>1</sup>H, and <sup>13</sup>C spectra were recorded with a JEOL EX-400 spectrometer (operating at 399.65 MHz for <sup>1</sup>H and 100.40 MHz for <sup>13</sup>C) by using the residual solvent as the internal reference for <sup>1</sup>H (CDCl<sub>3</sub>:  $\delta$ = 7.26 ppm; toluene-*d*<sub>8</sub>:  $\delta$ = 2.08 ppm; C<sub>2</sub>D<sub>2</sub>Cl<sub>4</sub>:  $\delta$ = 6.00 ppm) and <sup>13</sup>C (CDCl<sub>3</sub>:  $\delta$ = 77.16 ppm). High-resolution mass spectra (HRMS) were measured on a Thermo Fischer Scientific EXACTIVE Fourier-transform orbitrap mass spectrometer (APCI). Attenuated total reflectance-Fourier transform infrared (ATR-FTIR) spectra were taken with the golden gate diamond anvil ATR accessory (NICOLET 6700, Thermo scientific), using typically 64 scans at a resolution of 2 cm<sup>-1</sup>. All samples were placed in contact with the diamond window using the same mechanical force. Single crystal X-ray diffraction analysis data for **1a** were collected at monochromated MoK $\alpha$  radiation (0.71075 Å). The structures were solved by direct method (SHELXS-2014). Redox potentials were measured by cyclic voltammetry and differential pulse voltammetry method on an ALS electrochemical analyzer model 660A.

### Density Functional Theory (DFT) Calculations.

All calculations were carried out using the *Gaussian 09* program.<sup>S1</sup> The calculations were performed by the density functional theory (DFT) method with restricted B3LYP (Becke's three-parameter hybrid exchange functionals and the Lee-Yang-Parr correlation functional) level,<sup>S2,S3</sup> employing a basis set 6-31G(d,p) for C, H, N, O, S, Ni, and Zn.

## 2. Synthesis

[3-Iodo-5,10,15-tris(3,5-di-*tert*-butylphenyl)porphyrinato]nickel(II) (**3a**)<sup>S4</sup>, [3-iodo-5,15-bis(3,5-di-*tert*-butylphenyl)-10-(2,4,6-trimethylphenyl)porphyrinato]nickel(II) (**3b**)<sup>S5</sup>, and 2,5-bis(4,4,5,5-tetramethyl-1,3,2-dioxaborolan-2-yl)thiophene (**4**)<sup>S6</sup> were prepared according to literatures.

**Thiophene-bridged porphyrin dimer (5a):** A flask containing **3a** (211 mg, 0.2 mmol), thiophene **4** (33.6 mg, 0.1 mmol), SPhos-Pd-G2 (7.2 mg, 0.01 mmol) and K<sub>3</sub>PO<sub>4</sub> (106 mg, 0.5 mmol) was purged with argon, and charged with THF (8 mL) and H<sub>2</sub>O (2 mL). After stirring for 3 h at 65 °C, the reaction mixture was cooled to room temperature, quenched with water, extracted with CH<sub>2</sub>Cl<sub>2</sub>, and dried over Na<sub>2</sub>SO<sub>4</sub>. After removal of solvent, the crude product was purified with silica gel column chromatography using a 8:1 mixture of *n*-hexane and CH<sub>2</sub>Cl<sub>2</sub> to afford **5a**. Reprecipitation from CH<sub>2</sub>Cl<sub>2</sub> and MeOH gave **5a** (128.9 mg, 0.0663 mmol, 66%) as a red solid.

**5a:**<sup>S7</sup> <sup>1</sup>H NMR (399.65 MHz, CDCl<sub>3</sub>, 25 °C):  $\delta$  = 10.36 (s, 2H, *meso*), 9.20 (d, *J* = 4.3 Hz, 2H,  $\beta$ ), 9.14 (s, 2H,  $\beta$ ), 8.95 (d, *J* = 4.9 Hz, 2H,  $\beta$ ), 8.50-8.83 (m, 8H,  $\beta$ ), 8.14 (s, 2H, Thieryl), 7.98 (d, *J* = 1.8 Hz, 4H, Ar-*ortho*), 7.91 (d, *J* = 1.8 Hz, 4H, Ar-*ortho*), 7.89 (d, *J* = 1.8 Hz, 4H, Ar-*ortho*), 7.78-7.77 (m, 2H, Ar-*para*), 7.75-7.74 (m, 2H, Ar-*para*), 7.72 (m, 2H, Ar-*para*), 1.52 (s, 36H, *tert*-Butyl), 1.50 (s, 36H, *tert*-Butyl), 1.48 (s, 36H, *tert*-Butyl) ppm.

**Thiophene-bridged porphyrin dimer (5b):** A flask containing **3b** (41.7 mg, 0.042 mmol), thiophene **4** (7.09 mg, 0.021 mmol), SPhos-Pd-G2 (1.5 mg, 0.0021 mmol) and K<sub>3</sub>PO<sub>4</sub> (22.3 mg, 0.11 mmol) was purged with argon, and charged with THF (1.6 mL) and H<sub>2</sub>O (0.4 mL). After stirring for 13 h at 65 °C, the reaction mixture was cooled to room temperature, quenched with water, extracted with CH<sub>2</sub>Cl<sub>2</sub>, and dried over Na<sub>2</sub>SO<sub>4</sub>. After removal of solvent, the crude product was purified with silica gel column chromatography using a 6:1 mixture of *n*-hexane and CH<sub>2</sub>Cl<sub>2</sub>. Reprecipitation from CH<sub>2</sub>Cl<sub>2</sub> and MeOH gave **5b** (26.6 mg, 0.0147 mmol, 70%) as a red solid.

**5b:** <sup>1</sup>H NMR (399.65 MHz, CDCl<sub>3</sub>, 25 °C):  $\delta$  = 10.36 (s, 2H, *meso*), 9.20 (d, *J* = 4.9 Hz, 2H,  $\beta$ ), 9.13 (s, 2H,  $\beta$ ), 8.94 (d, *J* = 4.9 Hz, 2H,  $\beta$ ), 8.84 (d, *J* = 4.9 Hz, 2H,  $\beta$ ), 8.81 (d, *J* = 4.9 Hz, 2H,  $\beta$ ), 8.63 (d, *J* = 4.9 Hz, 4H,  $\beta$ ), 8.13 (s, 2H, Thieryl), 7.99 (d, *J* = 1.8 Hz, 4H, Ar-*ortho*), 7.93 (d, *J* = 1.8 Hz, 4H, Ar-*ortho*), 7.77 (m, 2H, Ar-*para*), 7.75 (m, 2H, Ar-*para*), 7.21 (s, 4H, Mes), 2.57 (s, 6H, Methyl), 1.84 (s, 12H, Methyl), 1.53 (s, 36H, *tert*-Butyl), 1.50 (s, 36H, *tert*-Butyl) ppm. <sup>13</sup>C NMR (100.40 MHz, CDCl<sub>3</sub>, 25 °C):  $\delta$  = 149.3, 149.2, 143.5, 143.4, 143.3, 143.2, 142.7, 142.6, 141.7, 140.1, 140.0, 139.8, 139.1, 137.8, 137.6, 137.5, 133.1, 133.0, 132.4, 131.4, 131.3, 130.7, 129.5, 129.3, 129.1, 127.9, 121.33, 121.29, 120.2, 119.9, 117.7, 104.2, 35.23, 35.19, 31.90, 31.87, 21.59, 21.55 ppm. HRMS (APCI) calcd for C<sub>118</sub>H<sub>124</sub>N<sub>8</sub>Ni<sub>2</sub>S<sub>1</sub>; [M+H]<sup>+</sup>: 1801.8449;

found 1801.8446. FT-IR (ATR):  $\nu = 2953, 2867, 1592, 1461, 1427, 1382, 1362, 1334, 1298, 1246, 1202, 1069, 1001, 974, 928, 900, 883, 827, 814, 796, 714 \text{ cm}^{-1}$ . m.p.:  $> 300 \text{ }^\circ\text{C}$ .

**Thiophene-fused helical porphyrin dimer (1a):** A flask containing **5a** (100 mg, 0.0514 mmol) was purged with argon, and then charged with  $\text{CHCl}_3$  (10.3 mL). Palau'Chlor (23.7 mg, 0.113 mmol) was added to the mixture at  $0 \text{ }^\circ\text{C}$ . The reaction mixture was stirred at  $0 \text{ }^\circ\text{C}$  for 30 min, and then stirred at room temperature for 13 h. The mixture was diluted with  $\text{CH}_2\text{Cl}_2$ , and then filtered through a small plug of silica gel with copious washing with  $\text{CH}_2\text{Cl}_2$ . After removal of solvent, the crude product of **6a** was using for next step without further purification. A flask containing **6a**,  $\text{Pd}(\text{OAc})_2$  (2.3 mg, 0.0103 mmol),  $\text{PCy}_3 \cdot \text{HBF}_4$  (7.6 mg, 0.0206 mmol), and  $\text{K}_2\text{CO}_3$  (14.2 mg, 0.103 mmol) was purged with argon, and charged with DMF (2.6 mL). The mixture was heated to reflux with stirring for 3.5 h, and then cooled to ambient temperature. The mixture was extracted with toluene, and dried over  $\text{Na}_2\text{SO}_4$ . After removal of solvent, the crude product was purified with silica gel column chromatography using a 10:1 mixture of *n*-hexane and  $\text{CH}_2\text{Cl}_2$  to afforded **1a**. Recrystallization from  $\text{CH}_2\text{Cl}_2$  and MeOH gave **1a** (43.4 mg, 0.0224 mmol, 43%) as a dark solid.

**1a:**  $^1\text{H}$  NMR (399.65 MHz,  $\text{CDCl}_3$ ,  $25 \text{ }^\circ\text{C}$ ):  $\delta = 8.33$  (d,  $J = 5.4 \text{ Hz}$ , 2H,  $\beta$ ), 8.22-8.07 (m, 14H,  $\beta + \text{Ar-ortho}$ ), 7.65 (m, 4H, *Ar-para*), 7.55 (m, 2H, *Ar-para*), 7.35 (s, 2H,  $\beta$ ), 7.22 (br, 4H, *Ar-ortho*), 7.01 (br, 4H, *Ar-ortho*), 1.56-1.23 (m, 108H, *tert*-Butyl) ppm.  $^{13}\text{C}$  NMR (100.40 MHz,  $\text{CDCl}_3$ ,  $25 \text{ }^\circ\text{C}$ ):  $\delta = 158.6, 149.7, 149.41, 149.37, 149.3, 146.9, 145.9, 145.3, 144.8, 143.2, 143.0, 142.9, 141.0, 140.9, 139.2, 139.1, 138.0, 133.8, 133.4, 131.3, 130.7, 129.9, 129.7, 128.7, 128.0, 125.9, 125.7, 121.6, 121.4, 121.1, 120.4, 119.9, 109.3, 35.1, 31.8$  ppm. UV/Vis/NIR ( $\text{CH}_2\text{Cl}_2$ ):  $\lambda$  ( $\epsilon$ ,  $\text{M}^{-1} \cdot \text{cm}^{-1}$ ) = 426 (139000), 462 (93200), 557 (49000), 615 (74300), 864 (4600), 975 (2500) nm. HRMS (APCI) calcd for  $\text{C}_{128}\text{H}_{140}\text{N}_8\text{Ni}_2\text{S}_1$ ;  $[\text{M}+\text{H}]^+$ : 1937.9701; found 1937.9672. FT-IR (ATR):  $\nu = 2953, 2904, 2867, 1592, 1461, 1425, 1393, 1361, 1298, 1247, 1072, 1012, 994, 974, 938, 900, 882, 861, 825, 715, 693 \text{ cm}^{-1}$ . m.p.:  $> 300 \text{ }^\circ\text{C}$ .

**Thiophene-fused helical porphyrin dimer (1b):** A flask containing **5b** (175.7 mg, 0.0974 mmol) was purged with argon, and then charged with  $\text{CHCl}_3$  (19.5 mL). Palau'Chlor (44.9 mg, 0.214 mmol) was added to the mixture at  $0 \text{ }^\circ\text{C}$ . The reaction mixture was stirring at  $0 \text{ }^\circ\text{C}$  for 30 min, and then stirred at room temperature for 13 h. The mixture was diluted with  $\text{CH}_2\text{Cl}_2$ , and then filtered through a small plug of silica gel with copious washing with  $\text{CH}_2\text{Cl}_2$ . After removal of solvent, the crude product of **6b** was using for next step without further purification. A flask containing **6b**,  $\text{Pd}(\text{OAc})_2$  (4.4 mg, 0.0195 mmol),  $\text{PCy}_3 \cdot \text{HBF}_4$  (14.3 mg, 0.0390 mmol), and  $\text{K}_2\text{CO}_3$  (26.9 mg, 0.195 mmol) was purged with argon, and charged with DMF (4.9 mL). The mixture was heated to reflux with stirring

for 4.5 h, and then cooled to ambient temperature. The mixture was extracted with toluene, and dried over Na<sub>2</sub>SO<sub>4</sub>. After removal of solvent, the crude product was purified with silica gel column chromatography using a 8:1 mixture of *n*-hexane and CH<sub>2</sub>Cl<sub>2</sub> to afford **1b**. Recrystallization from CH<sub>2</sub>Cl<sub>2</sub> and MeOH gave **1b** (52.7 mg, 0.0293 mmol, 30%) as a dark solid.

**1b**: <sup>1</sup>H NMR (399.65 MHz, CDCl<sub>3</sub>, 25 °C): δ = 8.34 (d, *J* = 4.9 Hz, 2H, β), 8.15-8.00 (m, 12H, β + Ar-ortho), 7.92 (d, *J* = 4.3 Hz, 2H, β), 7.65-7.64 (m, 2H, Ar-para), 7.54-7.53 (m, 2H, Ar-para), 7.33 (s, 2H, β), 7.22 (brs, 2H, Mes), 7.04 (brs, 2H, Mes), 2.50 (s, 6H, Methyl), 2.24 (s, 6H, Methyl), 1.61-1.22 (m, 78H, *tert*-Butyl and Methyl) ppm. <sup>13</sup>C NMR (100.40 MHz, CDCl<sub>3</sub>, 25 °C): δ = 158.6, 149.7, 149.4, 149.3, 147.0, 146.0, 145.4, 144.9, 142.8, 142.7, 142.4, 141.0, 140.9, 139.1, 138.7, 138.6, 138.0, 137.8, 136.3, 133.8, 132.1, 131.8, 131.1, 129.8, 128.8, 128.1, 128.0, 125.5, 122.9, 121.6, 121.1, 120.5, 120.0, 109.5, 35.2, 35.0, 31.9, 31.7, 31.6, 29.9, 21.5, 21.4, 21.0 ppm. UV/Vis/NIR (CH<sub>2</sub>Cl<sub>2</sub>): λ (ε, M<sup>-1</sup>·cm<sup>-1</sup>) = 417 (107000), 458 (90500), 559 (48600), 613 (78100), 859 (4700), 975 (2300) nm. HRMS (APCI) calcd for C<sub>118</sub>H<sub>120</sub>N<sub>8</sub>Ni<sub>2</sub>Si; [M+H]<sup>+</sup>: 1797.8136; found 1797.8126. FT-IR (ATR): ν = 2951, 2865, 1590, 1458, 1393, 1351, 1296, 1240, 1201, 1069, 1008, 991, 972, 935, 899, 882, 855, 825, 796, 741, 716, 697, 685 cm<sup>-1</sup>. m.p.: > 300 °C.

#### Thiophene-fused helical porphyrin dimer (**2**):

Conc. H<sub>2</sub>SO<sub>4</sub> (0.22 mL) was added to the mixture of **1b** (40 mg, 0.0222 mmol) and trifluoroacetic acid (2.2 mL) at 0 °C. The reaction mixture was stirring for 2 h at 0 °C under dark condition. After neutralization by KOH aq. at 0 °C, the product was extracted with CH<sub>2</sub>Cl<sub>2</sub> and dried over Na<sub>2</sub>SO<sub>4</sub>. After removal of solvent, a solution of Zn(OAc)<sub>2</sub>·2H<sub>2</sub>O (97.6 mg, 0.445 mmol) in MeOH (1.1 mL) was added to the crude product in CH<sub>2</sub>Cl<sub>2</sub> (1.1 mL). The reaction mixture was stirring for 1h at room temperature under dark condition. After removal of solvent, the mixture was diluted with a 1:1 mixture of *n*-hexane and CH<sub>2</sub>Cl<sub>2</sub> and filtered through a small plug of silica gel with copious washings with a 1:1 mixture of *n*-hexane and CH<sub>2</sub>Cl<sub>2</sub> as eluent to afford **2** (38.4 mg, 0.0212 mmol, 95%) as a dark solid.

**2**: <sup>1</sup>H NMR (399.65 MHz, CDCl<sub>3</sub>, 25 °C): δ = 8.75 (d, *J* = 4.9 Hz, 2H, β), 8.28 (d, *J* = 4.3 Hz, 2H, β), 8.21 (d, *J* = 4.3 Hz, 2H, β), 8.19 (d, *J* = 4.9 Hz, 2H, β), 8.17 (d, *J* = 4.9 Hz, 2H, β), 8.11 (m, 2H, Ar), 8.08 (m, 2H, Ar), 8.06 (d, *J* = 4.3 Hz, 2H, β), 7.70-7.69 (m, 2H, Ar), 7.67 (m, 2H, Ar), 7.61-7.60 (m, 2H, Ar), 7.56 (m, 2H, Ar), 7.31 (s, 2H, β), 7.21 (brs, 2H, Mes), 7.15 (brs, 2H, Mes), 2.56 (s, 6H, Methyl), 2.05 (s, 6H, Methyl), 1.81 (s, 6H, Methyl), and 1.57 (s, 18H, *tert*-Butyl), 1.50 (s, 18H, *tert*-Butyl), 1.47 (s, 18H, *tert*-Butyl), 1.33 (s, 18H, *tert*-Butyl) ppm. <sup>13</sup>C NMR (100.40 MHz, CDCl<sub>3</sub>, 25 °C): δ = 167.7, 154.3, 153.9, 153.3, 152.4, 151.6, 150.2, 149.2, 149.1, 148.9, 148.5, 142.8, 141.5, 140.8, 139.7, 138.9, 138.7, 138.3, 137.5, 132.4, 131.8, 131.5, 131.3, 130.8, 130.1, 129.6, 129.2, 129.1, 127.9, 127.8, 124.8, 121.8, 121.3, 120.6, 118.3,

112.1, 35.20, 35.15, 35.1, 35.0, 31.94, 31.90, 31.86, 31.7, 29.9, 21.6, 21.5, 21.4 ppm. UV/Vis/NIR (CH<sub>2</sub>Cl<sub>2</sub>):  $\lambda$  ( $\epsilon$ , M<sup>-1</sup>·cm<sup>-1</sup>) = 422 (113000), 436 (108000), 475 (106000), 568 (45100), 661 (71000), 910 (4000), 1040 (1400) nm. HRMS (APCI) calcd for C<sub>118</sub>H<sub>120</sub>N<sub>8</sub>Zn<sub>2</sub>S<sub>1</sub>; [M+H]<sup>+</sup>: 1809.8012; found 1809.7994. FT-IR (ATR):  $\nu$  = 2952, 2862, 1589, 1475, 1458, 1424, 1392, 1360, 1335, 1285, 1243, 1200, 1063, 1007, 984, 966, 934, 881, 820, 795, 738, 727, 715 cm<sup>-1</sup>. m.p.: > 300 °C.

### 3. High-Resolution Mass Spectra

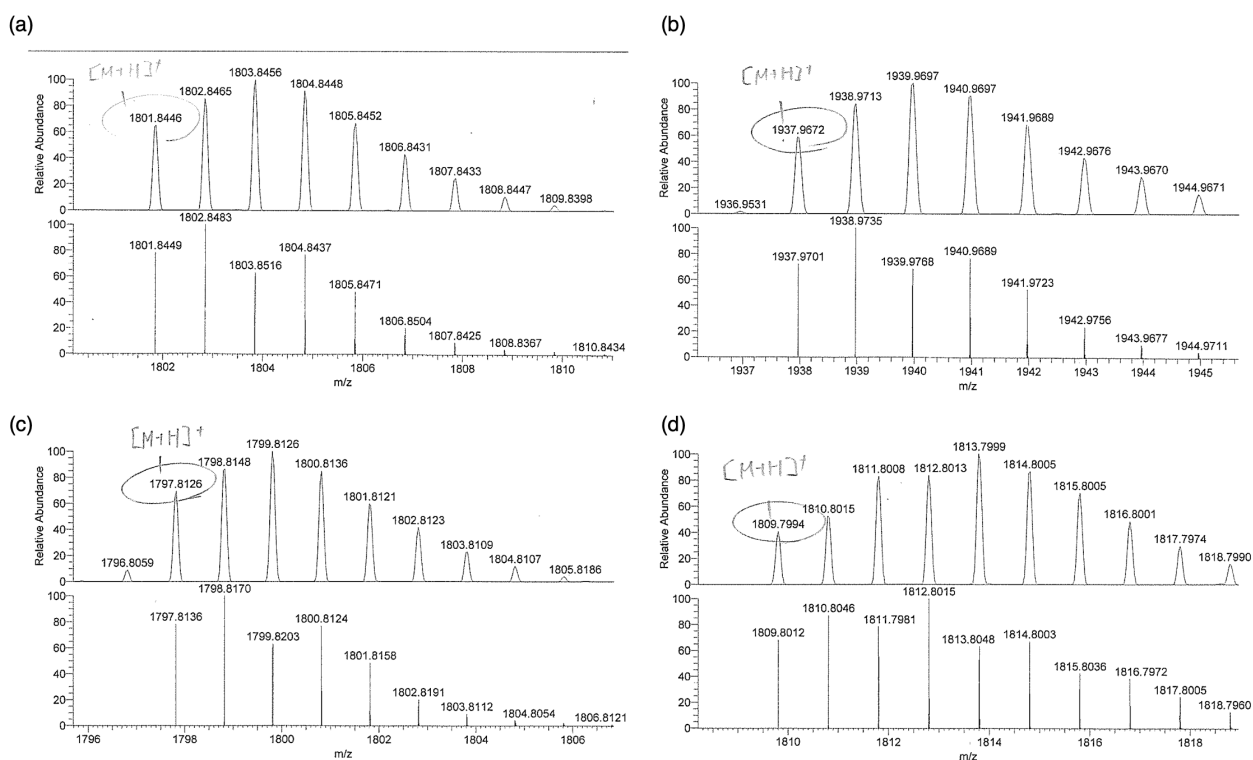

Figure S1. Observed (top) and simulated (bottom) high-resolution mass spectra of (a) **5b**, (b) **1a**, (c) **1b**, and (d) **2**.

## 4. NMR Spectra

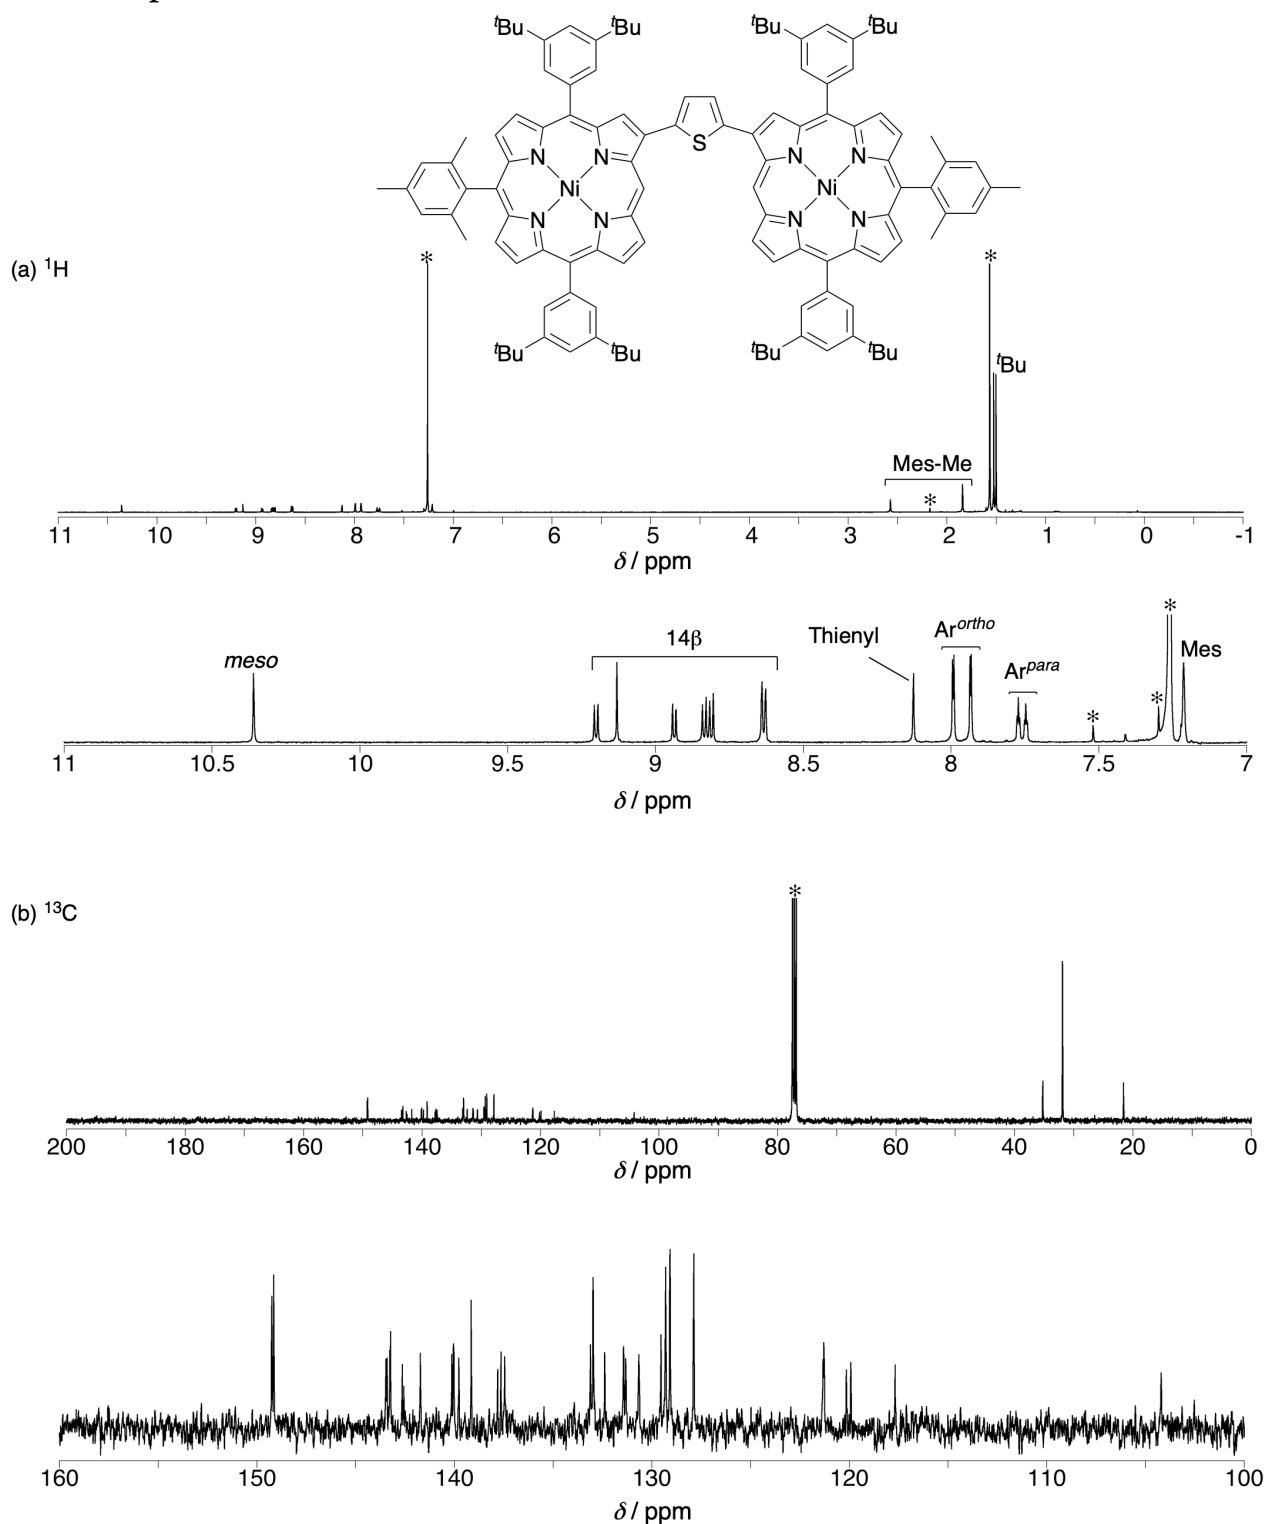

**Figure S2.** (a)  $^1H$  and (b)  $^{13}C$  NMR spectra of **5b** at 25 °C in  $CDCl_3$ . Peaks marked with \* arise from residual solvents.



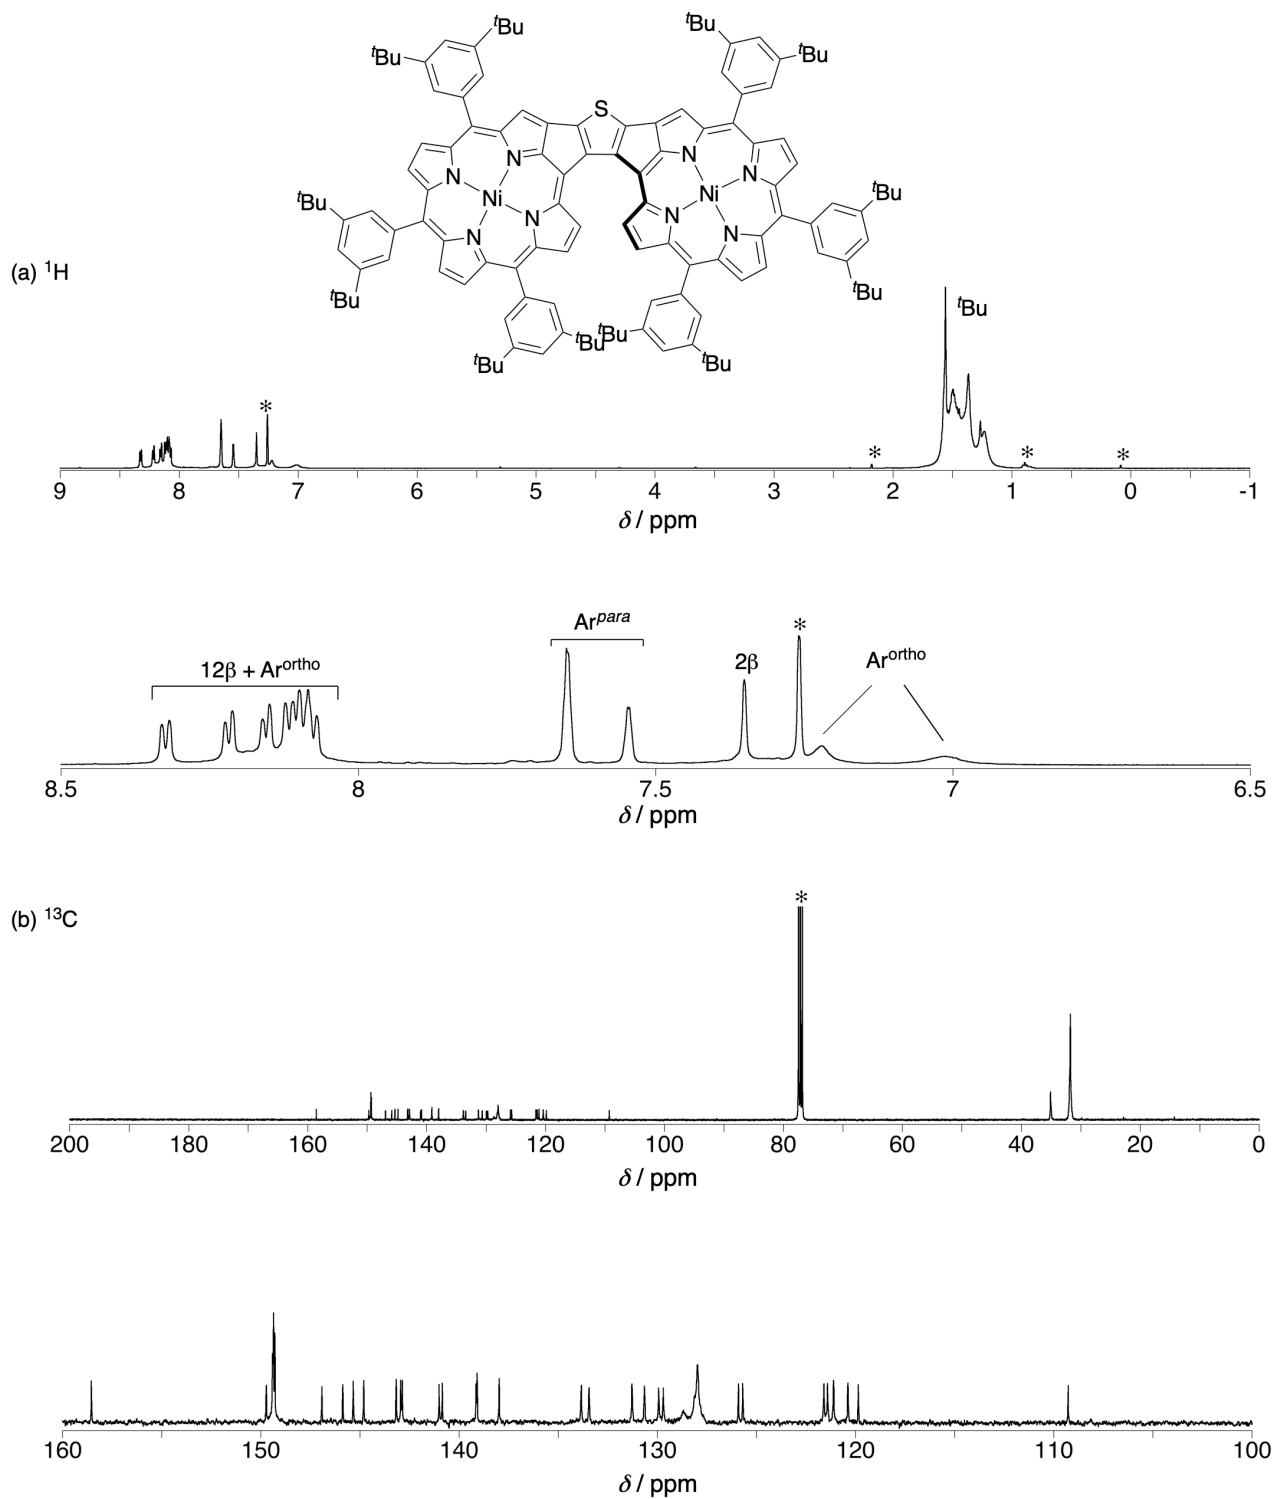

**Figure S3.** (a)  $^1\text{H}$  and (b)  $^{13}\text{C}$  NMR spectra of **1a** at 25 °C in  $\text{CDCl}_3$ . Peaks marked with \* arise from residual solvents.

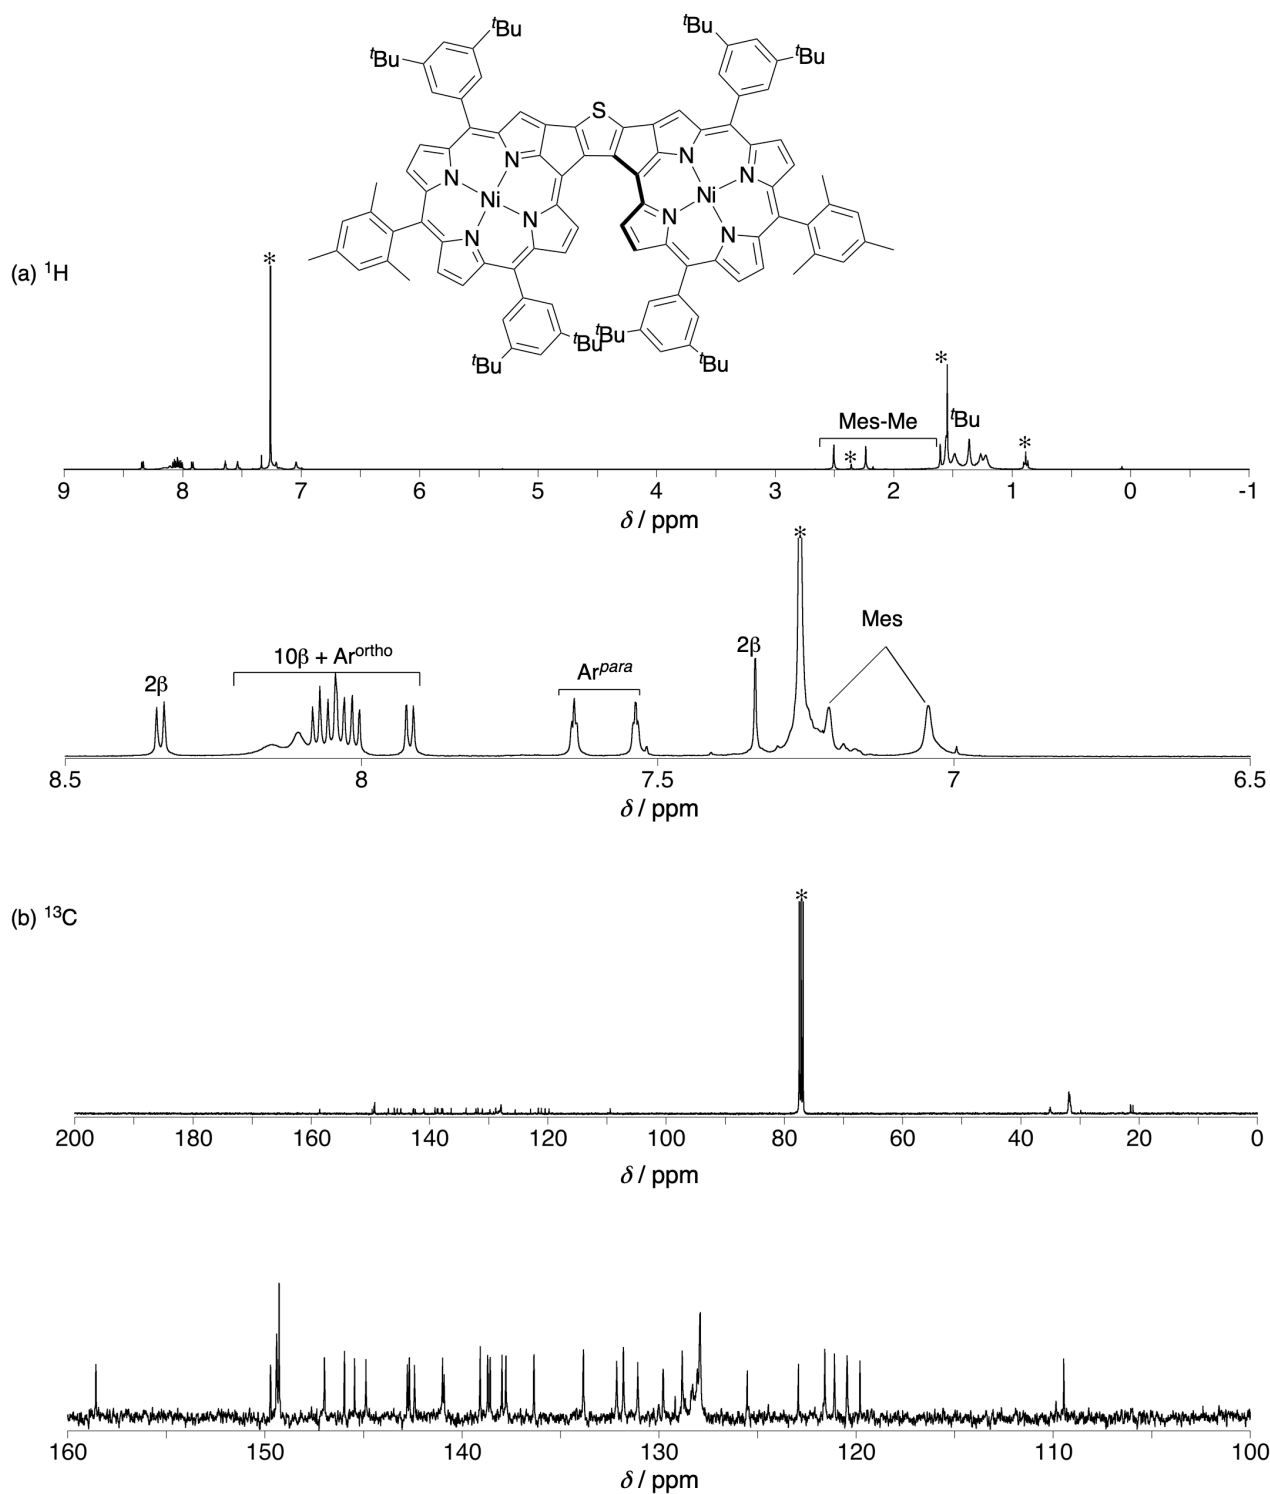

**Figure S4.** (a)  $^1\text{H}$  and (b)  $^{13}\text{C}$  NMR spectra of **1b** at 25 °C in  $\text{CDCl}_3$ . Peaks marked with \* arise from residual solvents.

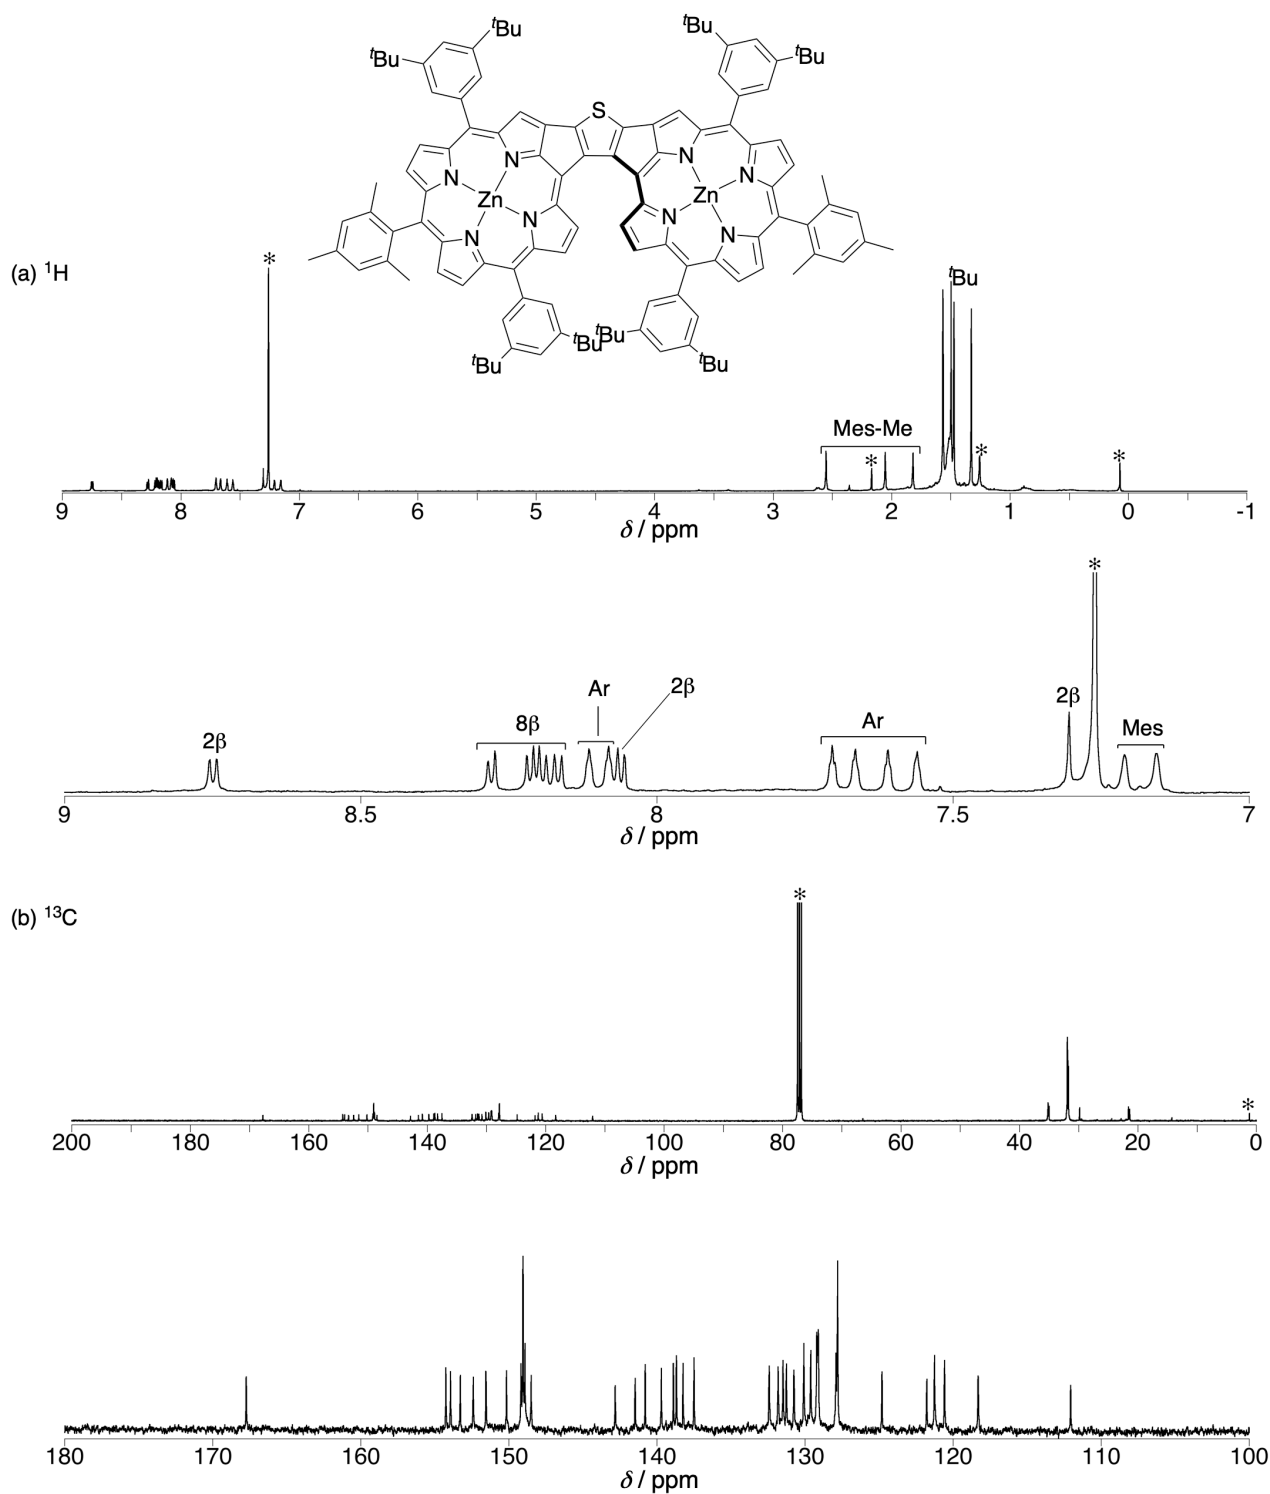

**Figure S5.** (a)  $^1\text{H}$  and (b)  $^{13}\text{C}$  NMR spectra of **2** at 25 °C in  $\text{CDCl}_3$ . Peaks marked with \* arise from residual solvents.

## 5. X-Ray Crystallographic Details

(a)

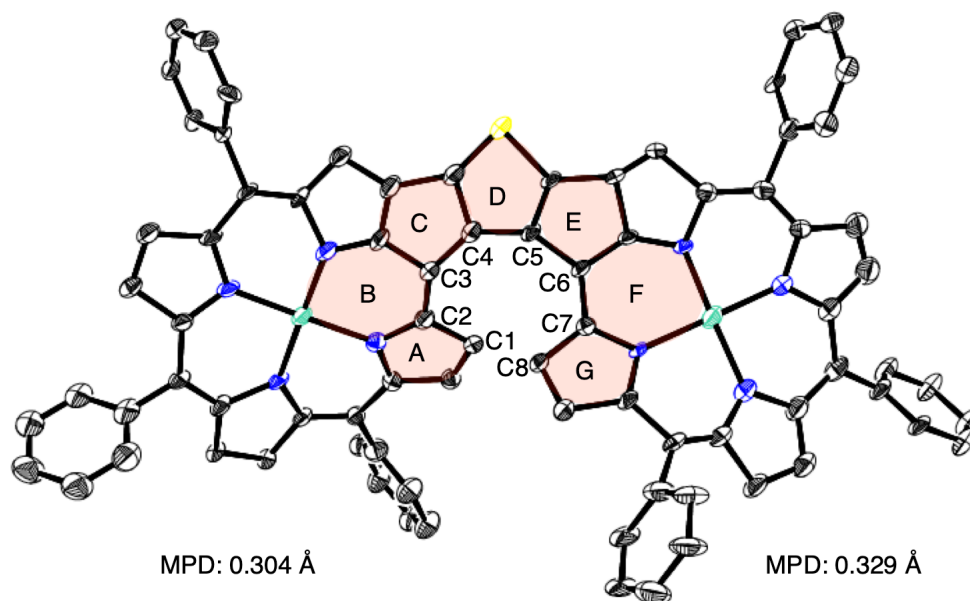

(b)

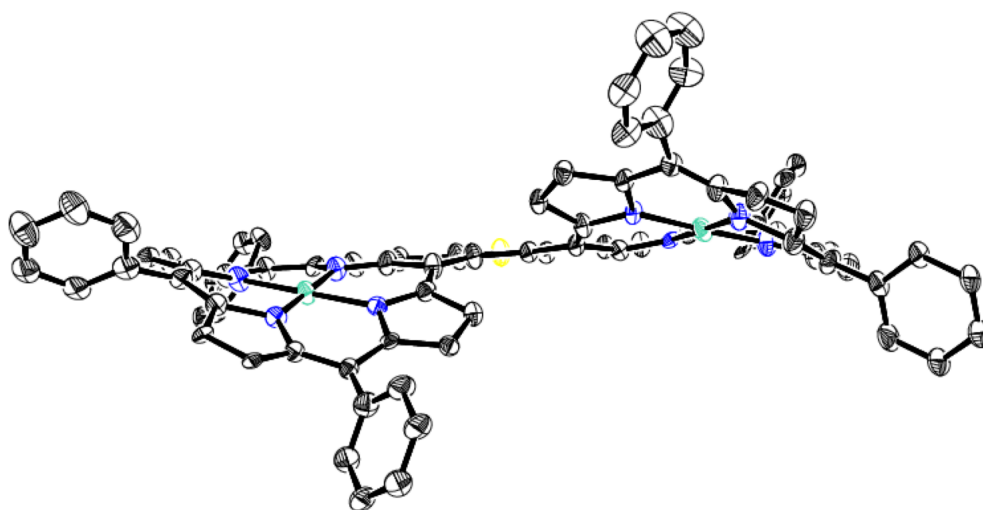

**Figure S6.** X-Ray crystal structure of the other independent molecule of **1a**: a) top view and b) side view. Thermal ellipsoids represent 50% probability. Solvent molecules, all hydrogen atoms, and *tert*-butyl groups are omitted for clarity. The disordered solvents are removed by the use of utility SQUEEZE in the PLATON software package<sup>S8</sup>. Selected torsion angle [°]:  $\angle$  C1-C2-C3-C4 4(5);  $\angle$  C2-C3-C4-C5 -25(6);  $\angle$  C3-C4-C5-C6 -15(6);  $\angle$  C4-C5-C6-C7 -19(5);  $\angle$  C5-C6-C7-C8 -6(4).

**Table S1.** Crystal data using SQUEEZE of **1a**.

|                                                             | <b>1a</b>                                                                                                 |
|-------------------------------------------------------------|-----------------------------------------------------------------------------------------------------------|
| formula                                                     | 2(C <sub>128</sub> H <sub>140</sub> N <sub>8</sub> Ni <sub>2</sub> S <sub>1</sub> )·7(CHCl <sub>3</sub> ) |
| <i>M</i> <sub>r</sub>                                       | 4715.48                                                                                                   |
| <i>T</i> [K]                                                | 153                                                                                                       |
| crystal system                                              | triclinic                                                                                                 |
| space group                                                 | <i>P</i> 1 (No.1)                                                                                         |
| <i>a</i> [Å]                                                | 19.992(4)                                                                                                 |
| <i>b</i> [Å]                                                | 20.190(5)                                                                                                 |
| <i>c</i> [Å]                                                | 21.414(3)                                                                                                 |
| $\alpha$ [°]                                                | 69.720(15)                                                                                                |
| $\beta$ [°]                                                 | 63.048(12)                                                                                                |
| $\gamma$ [°]                                                | 80.939(17)                                                                                                |
| <i>V</i> [Å <sup>3</sup> ]                                  | 7202(3)                                                                                                   |
| <i>Z</i>                                                    | 1                                                                                                         |
| $\rho_{\text{calcd}}$ [g·cm <sup>-3</sup> ]                 | 1.087                                                                                                     |
| <i>F</i> [000]                                              | 2478                                                                                                      |
| crystal size [mm <sup>3</sup> ]                             | 0.10×0.05×0.03                                                                                            |
| 2 $\theta_{\text{max}}$ [°]                                 | 50.0                                                                                                      |
| reflections collected                                       | 48710                                                                                                     |
| independent reflections                                     | 35758                                                                                                     |
| parameters                                                  | 2611                                                                                                      |
| <i>R</i> <sub>1</sub> [ <i>I</i> > 2 $\sigma$ ( <i>I</i> )] | 0.1317                                                                                                    |
| <i>wR</i> <sub>2</sub> [all data]                           | 0.3652                                                                                                    |
| GOF                                                         | 1.047                                                                                                     |
| CCDC number                                                 | 2093263                                                                                                   |

## 6. Racemic Inversion Barriers

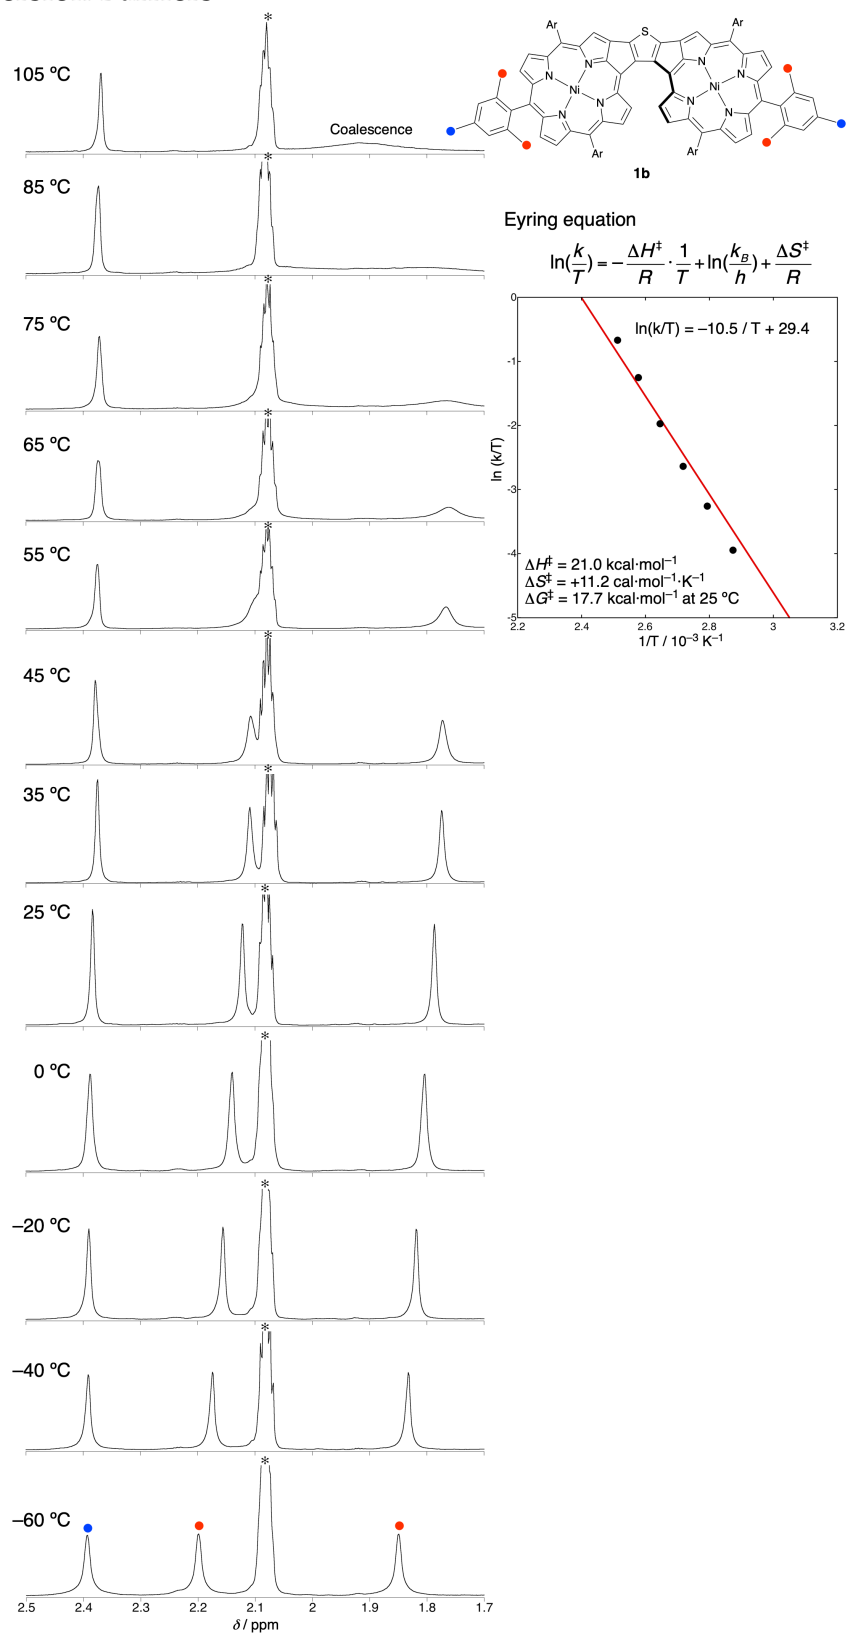

**Figure S7.** Temperature-dependent  $^1\text{H}$  NMR spectra of **1b** in toluene- $d_6$  and Eyring plot for determination of inversion barrier. Peaks marked with \* arise from residual solvents.

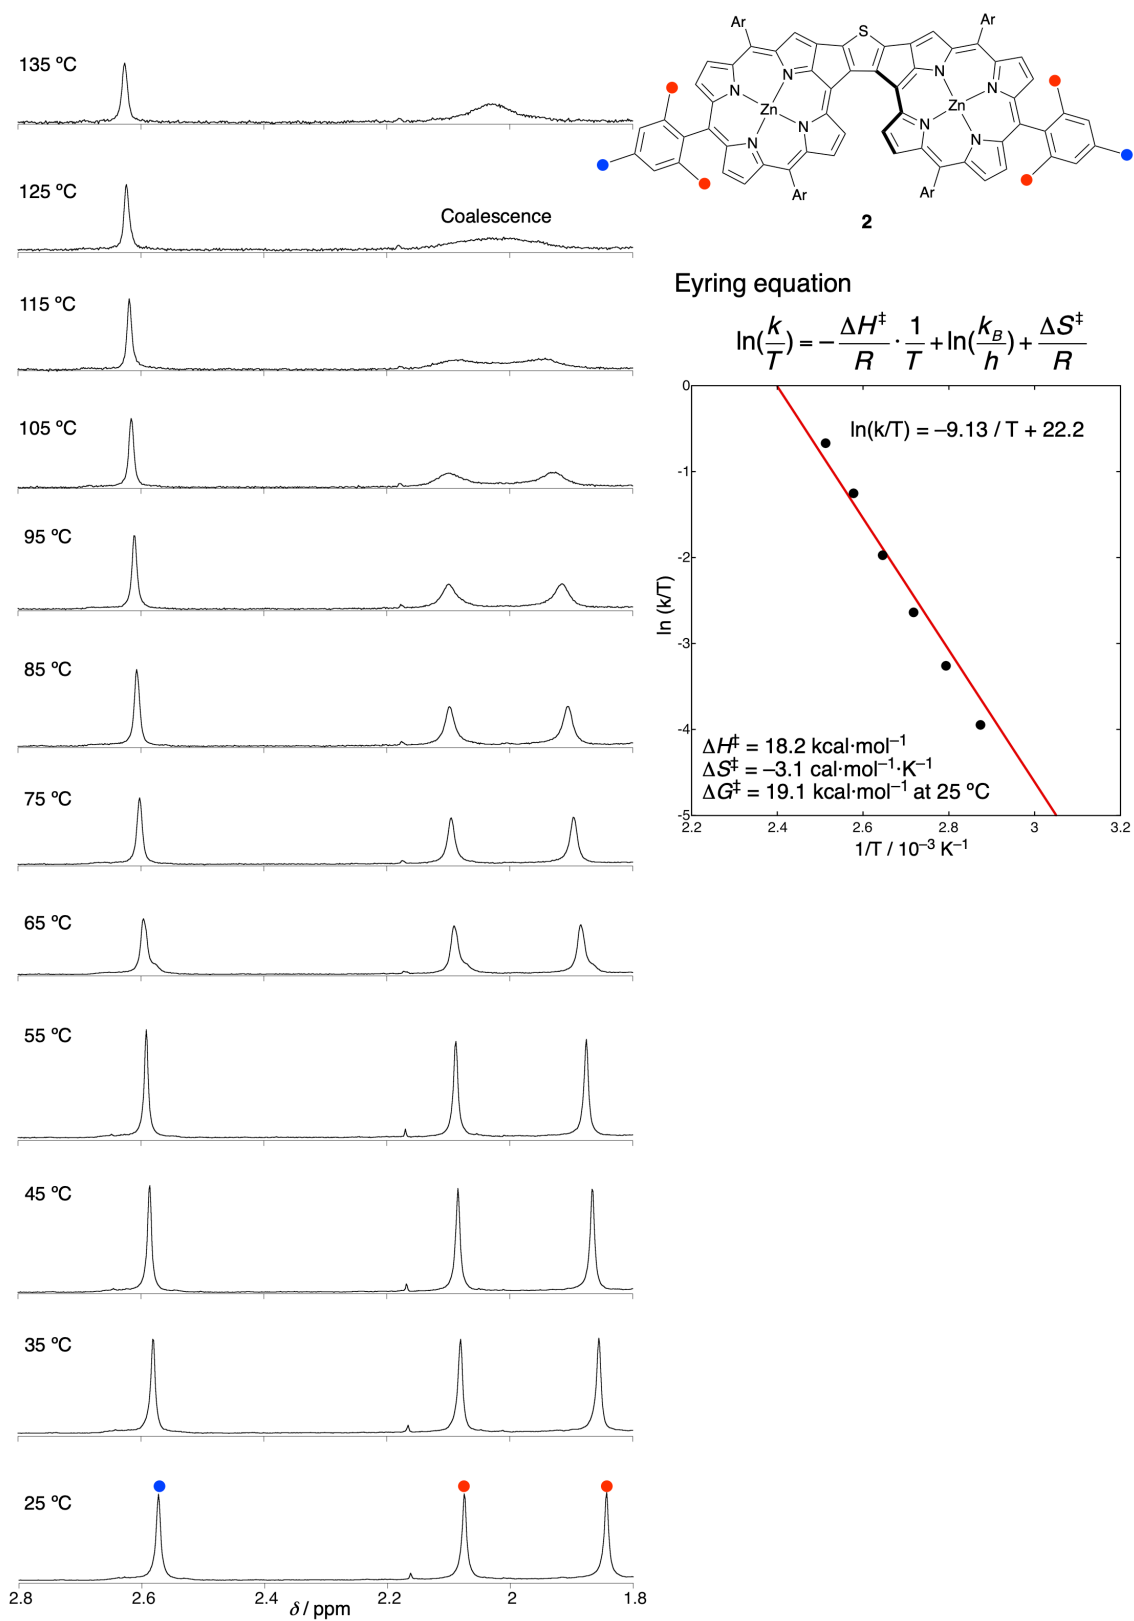

Figure S8. Temperature-dependent  $^1\text{H}$  NMR spectra of **2** in  $\text{C}_2\text{D}_2\text{Cl}_4$  and Eyring plot for determination of inversion barrier.

## 7. Optical Properties

**Table S2.** UV/Vis/NIR Absorption properties of porphyrin dimers **1** and **2** in CH<sub>2</sub>Cl<sub>2</sub>.

| porphyrin | $\lambda_{\text{abs}} / \text{nm}$ ( $\epsilon / 10^4 \text{M}^{-1}\cdot\text{cm}^{-1}$ ) |
|-----------|-------------------------------------------------------------------------------------------|
| <b>1a</b> | 426 (14), 462 (9.3), 557 (4.9), 615 (7.4), 864 (0.46), 975 (0.25)                         |
| <b>1b</b> | 417 (11), 458 (9.1), 559 (4.9), 613 (7.8), 859 (0.47), 975 (0.23)                         |
| <b>2</b>  | 422 (11), 436 (11), 475 (11), 568 (4.5), 661 (7.1), 910 (0.40), 1040 (0.14)               |



## 8. Electrochemical Properties

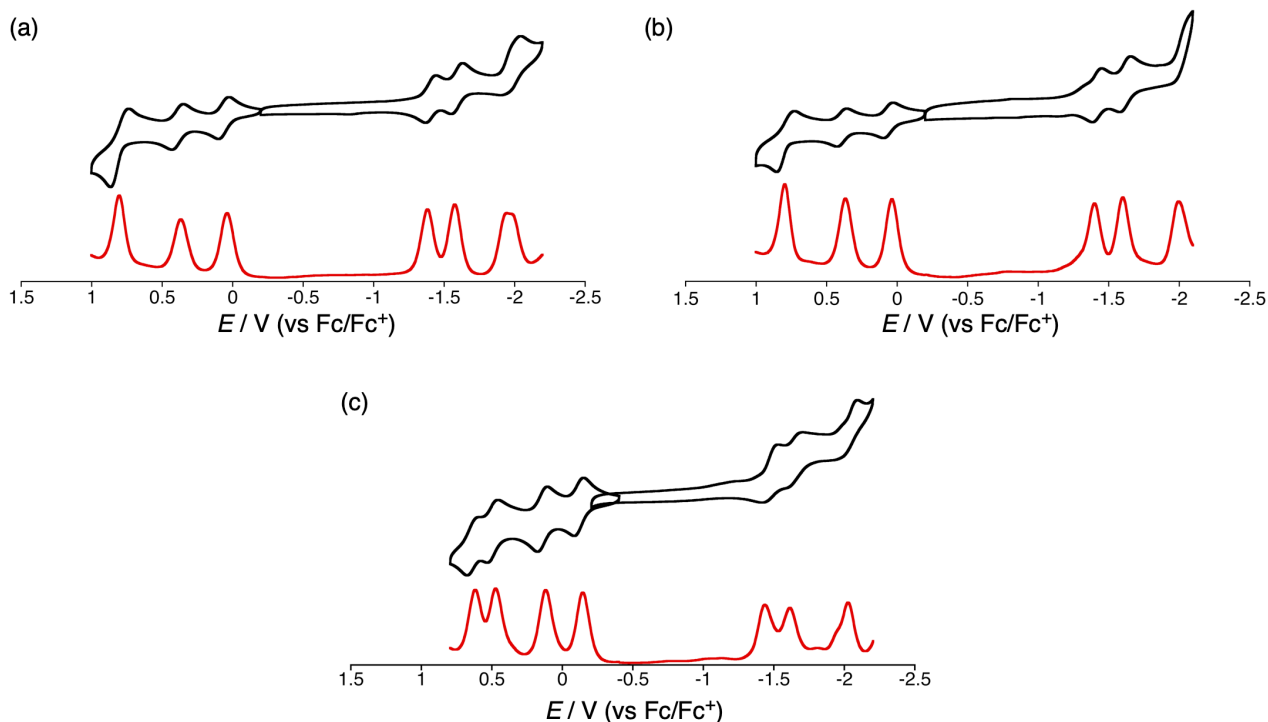

**Figure S9.** Cyclic voltammograms (black) and differential pulse voltammetry (DPV) curves (red) of porphyrin dimers (a) **1a**, (b) **1b**, and (c) **2**. Redox potentials were determined by DPV. Solvent: CH<sub>2</sub>Cl<sub>2</sub>; scan rate: 0.05 V·s<sup>-1</sup>; working electrode: glassy carbon; reference electrode: Ag/Ag<sup>+</sup> (0.01 M AgNO<sub>3</sub>); electrolyte: 0.1 M *n*-Bu<sub>4</sub>NPF<sub>6</sub>.

**Table S3.** Electrochemical oxidation and reduction potentials of thiophene-fused porphyrin dimers versus Fc/Fc<sup>+</sup>.

|           | $E_{\text{ox4}}/\text{V}$ | $E_{\text{ox3}}/\text{V}$ | $E_{\text{ox2}}/\text{V}$ | $E_{\text{ox1}}/\text{V}$ | $E_{\text{red1}}/\text{V}$ | $E_{\text{red2}}/\text{V}$ | $E_{\text{red3}}/\text{V}$ | $E_{\text{g}}^{\text{CV}}/\text{V}$ |
|-----------|---------------------------|---------------------------|---------------------------|---------------------------|----------------------------|----------------------------|----------------------------|-------------------------------------|
| <b>1a</b> | –                         | 0.80                      | 0.37                      | 0.04                      | –1.38                      | –1.58                      | –1.94                      | 1.42                                |
| <b>1b</b> | –                         | 0.80                      | 0.37                      | 0.04                      | –1.40                      | –1.60                      | –2.00                      | 1.44                                |
| <b>2</b>  | 0.62                      | 0.47                      | 0.12                      | –0.14                     | –1.44                      | –1.61                      | –2.03                      | 1.30                                |

## 9. DFT Calculations

(a)

top view

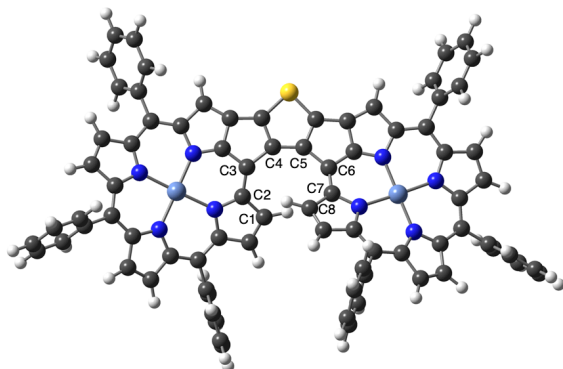

side view

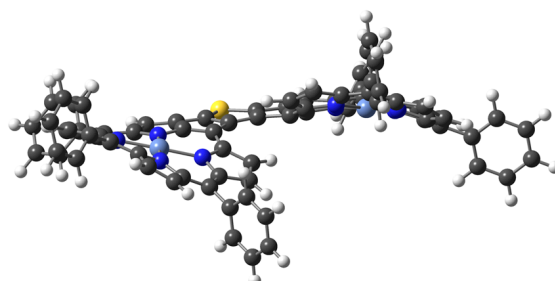

(b)

top view

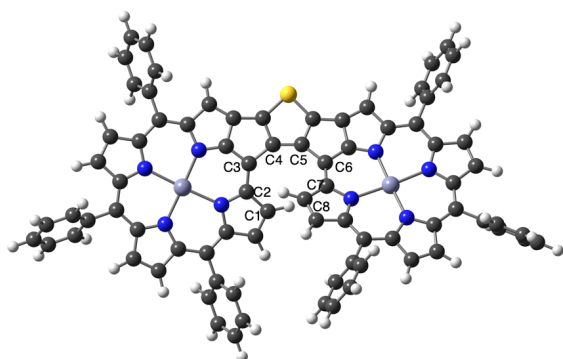

side view

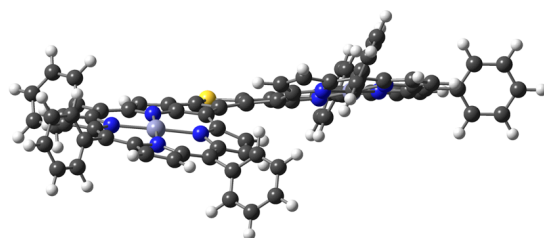

**Figure S10.** Optimized structures of (a) **1** and (b) **2**. Substituents at *meso*-positions were replaced with phenyl groups for clarity.

**Table S4.** Selected bond lengths and torsion angles of **1** and **2**.

|                           | <b>1</b> | <b>2</b> |
|---------------------------|----------|----------|
| C1–C2 / Å                 | 1.440    | 1.445    |
| C2–C3 / Å                 | 1.387    | 1.398    |
| C3–C4 / Å                 | 1.492    | 1.499    |
| C4–C5 / Å                 | 1.412    | 1.416    |
| C5–C6 / Å                 | 1.492    | 1.499    |
| C6–C7 / Å                 | 1.387    | 1.398    |
| C7–C8 / Å                 | 1.440    | 1.445    |
| <hr/>                     |          |          |
| ∠ C1–C2–C3–C4 / °         | 0.9      | 2.4      |
| ∠ C2–C3–C4–C5 / °         | 26.2     | 21.8     |
| ∠ C3–C4–C5–C6 / °         | 5.3      | 8.6      |
| ∠ C4–C5–C6–C7 / °         | 26.2     | 21.8     |
| ∠ C5–C6–C7–C8 / °         | 0.9      | 2.4      |
| <hr/>                     |          |          |
| Sum of torsion angles / ° | 59.5     | 57.0     |

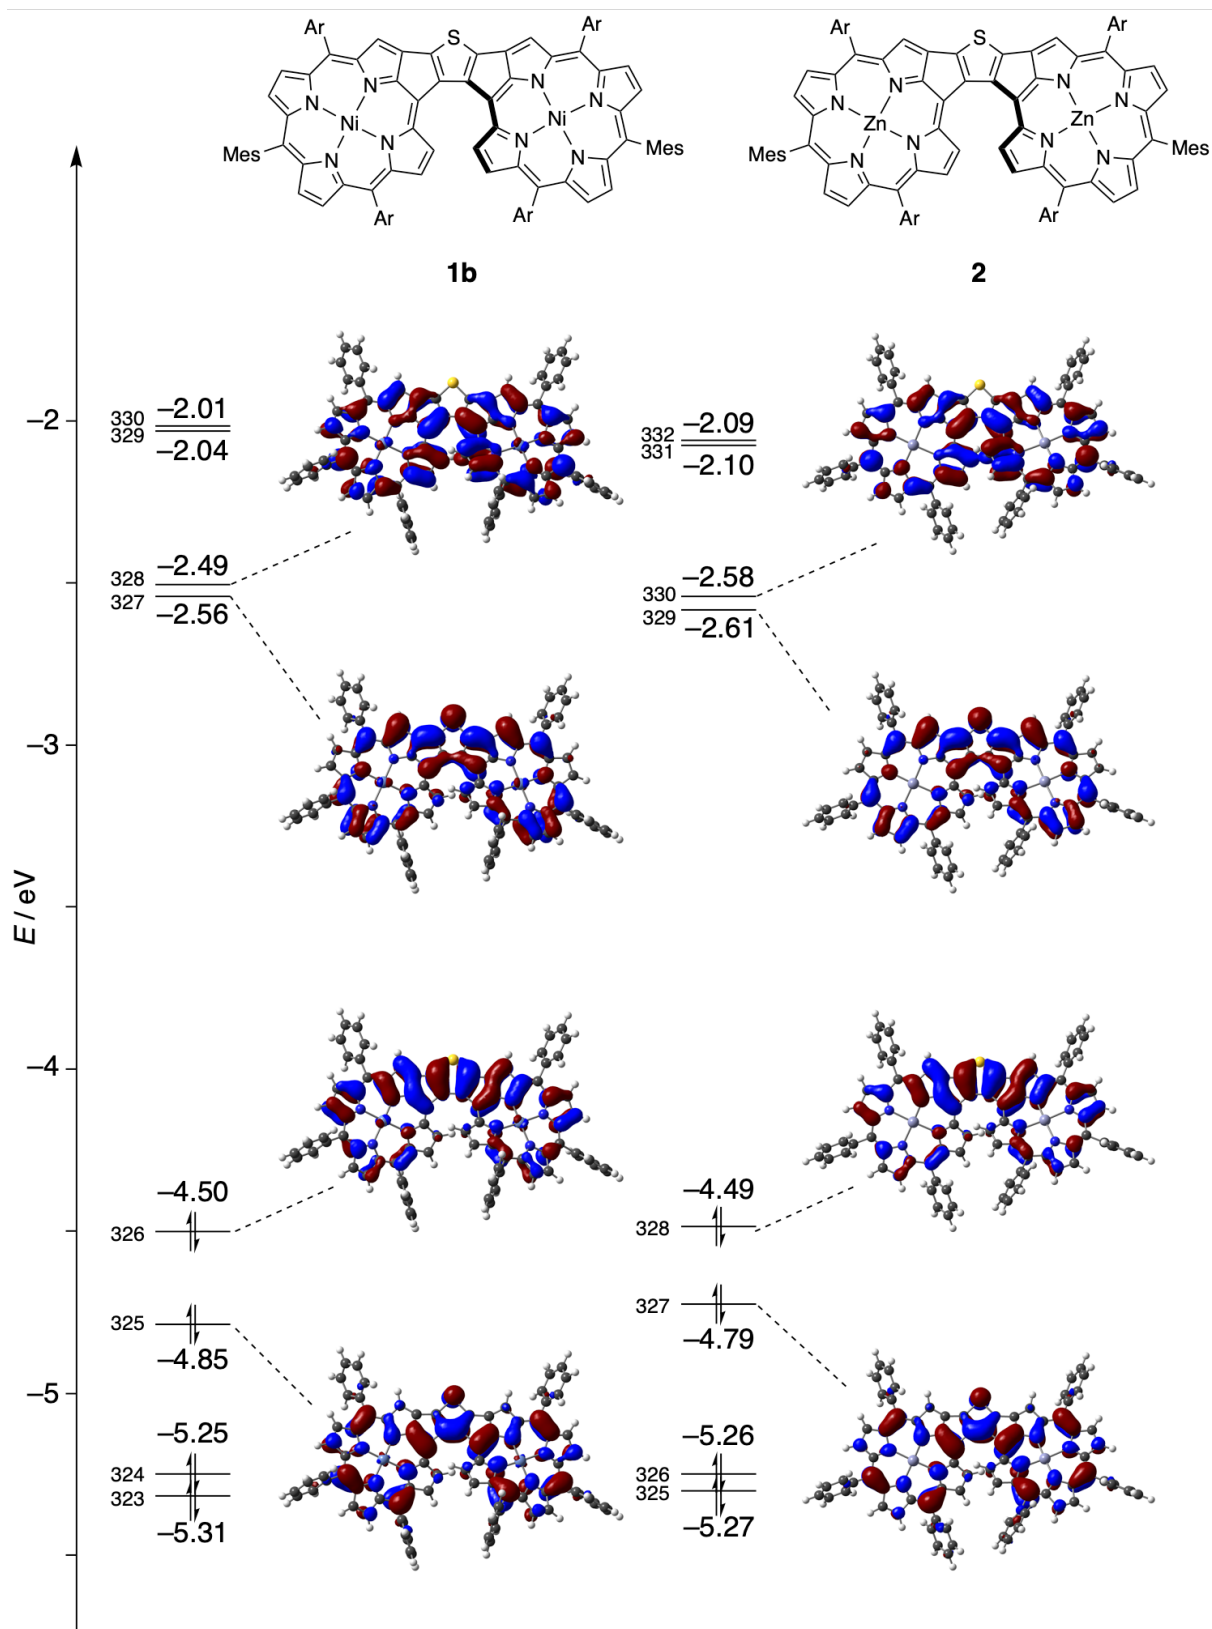

**Figure S11.** Selected Kohn-Sham orbitals of **1b** and **2**. Substituents at *meso*-positions were replaced with phenyl groups for clarity.

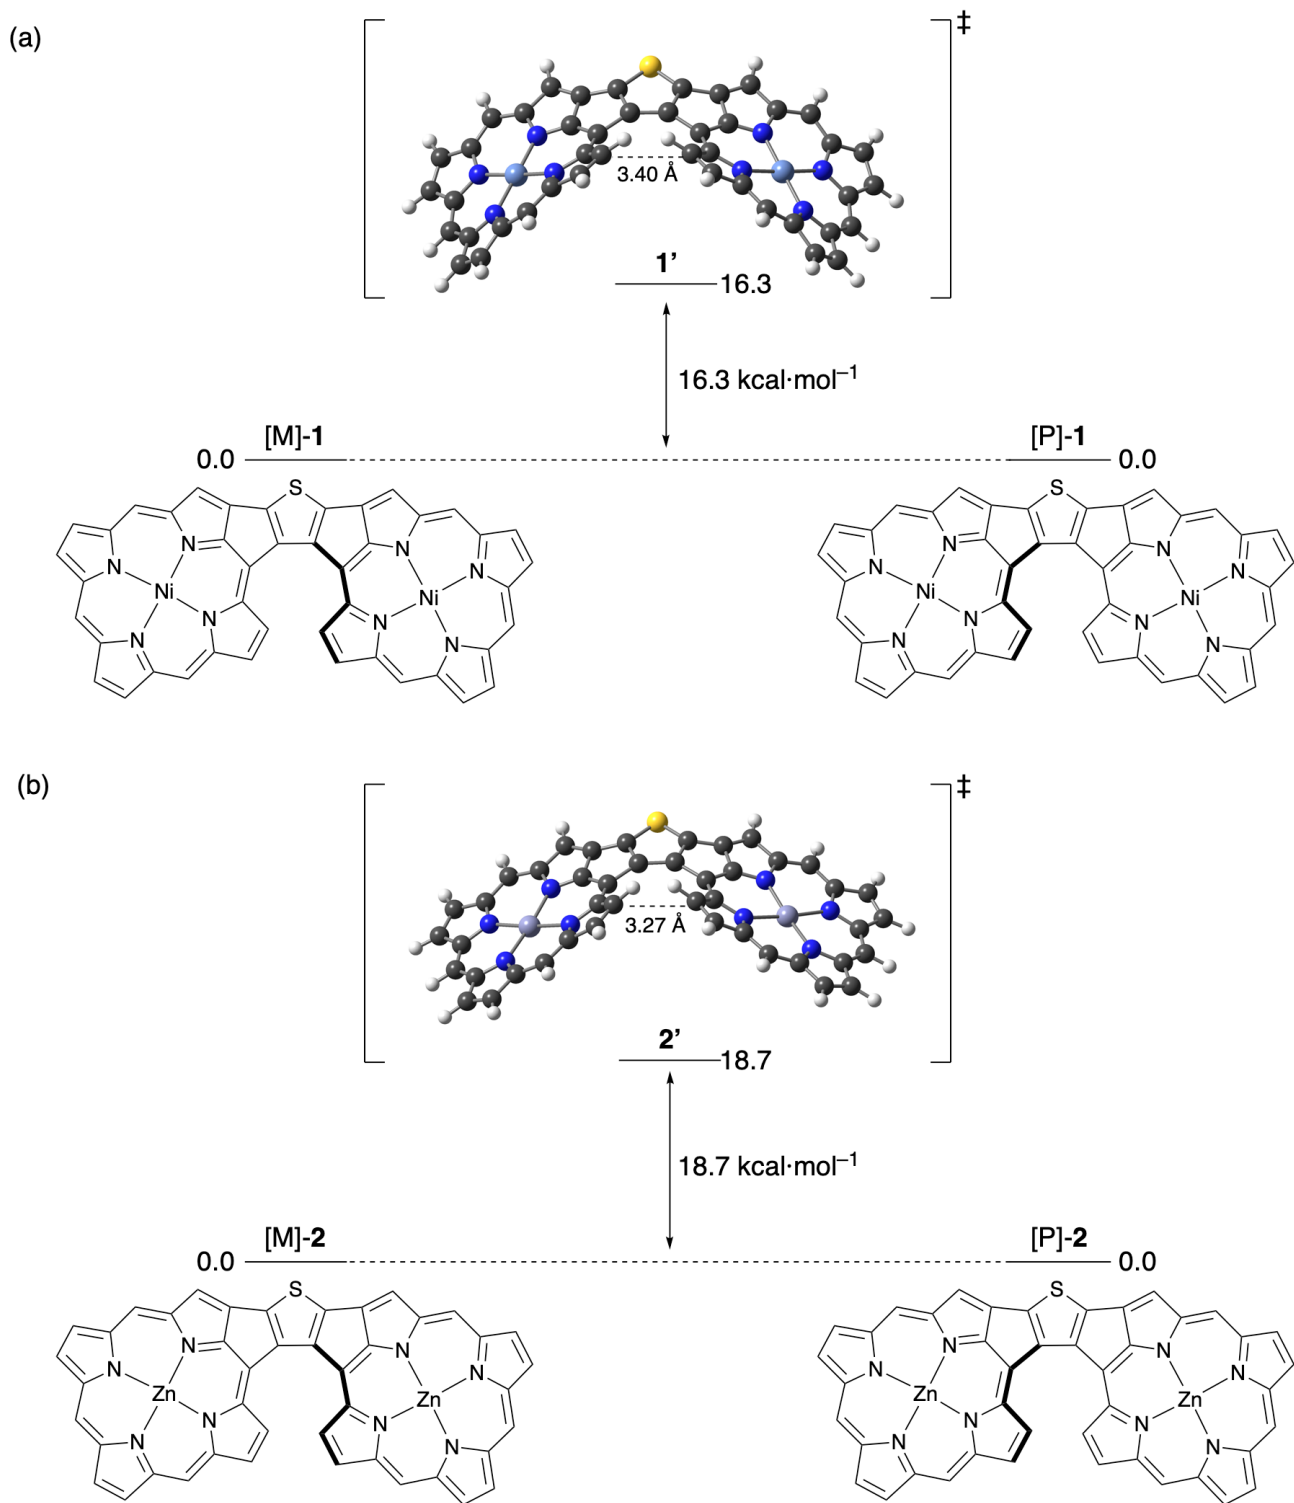

**Figure S12.** Racemization inversion processes of (a) **1'** and (b) **2'** with the relative Gibbs free energy (kcal·mol<sup>-1</sup>) by DFT calculations with B3LYP/6-31G(d,p). The *meso*-aryl substituents and mesityl groups were replaced with hydrogen atoms to simplify the calculations.

## 10. References

- [S1] Gaussian 09, Revision E.01, M. J. Frisch, G. W. Trucks, H. B. Schlegel, G. E. Scuseria, M. A. Robb, J. R. Cheeseman, G. Scalmani, V. Barone, B. Mennucci, G. A. Petersson, H. Nakatsuji, M. Caricato, X. Li, H. P. Hratchian, A. F. Izmaylov, J. Bloino, G. Zheng, J. L. Sonnenberg, M. Hada, M. Ehara, K. Toyota, R. Fukuda, J. Hasegawa, M. Ishida, T. Nakajima, Y. Honda, O. Kitao, H. Nakai, T. Vreven, J. A. Montgomery, Jr., J. E. Peralta, F. Ogliaro, M. Bearpark, J. J. Heyd, E. Brothers, K. N. Kudin, V. N. Staroverov, T. Keith, R. Kobayashi, J. Normand, K. Raghavachari, A. Rendell, J. C. Burant, S. S. Iyengar, J. Tomasi, M. Cossi, N. Rega, J. M. Millam, M. Klene, J. E. Knox, J. B. Cross, V. Bakken, C. Adamo, J. Jaramillo, R. Gomperts, R. E. Stratmann, O. Yazyev, A. J. Austin, R. Cammi, C. Pomelli, J. W. Ochterski, R. L. Martin, K. Morokuma, V. G. Zakrzewski, G. A. Voth, P. Salvador, J. J. Dannenberg, S. Dapprich, A. D. Daniels, O. Farkas, J. B. Foresman, J. V. Ortiz, J. Cioslowski and D. J. Fox, Gaussian, Inc., Wallingford CT, 2013.
- [S2] A. D. Becke, *J. Chem. Phys.*, 1993, **98**, 1372.
- [S3] C. Lee, W. Yang and R. G. Parr, *Phys. Rev. B*, 1998, **37**, 785.
- [S4] T. Ishiyama, J. Takagi, Y. Nobuta and N. Miyaura, *Org. Synth.*, 2005, **82**, 126.
- [S5] K. Fujimoto, H. Yorimitsu and A. Osuka, *Org. Lett.*, 2014, **16**, 972.
- [S6] N. Fukui and A. Osuka, *Angew. Chem. Int. Ed.*, 2018, **57**, 6304.
- [S7] T. Higashino, I. Nishimura and H. Imahori, *Chem. Lett.*, 2019, **48**, 257.
- [S8] PLATON, a multipurpose crystallographic tool, Utrecht University, Utrecht (The Netherlands); A. L. Spek. *J. Appl. Crystallogr.*, 2003, **36**, 7.
